# Supplementary material for: Clinical, laboratory data and inflammatory biomarkers at baseline as early discharge predictors in hospitalized SARS-CoV-2 infected patients
Source: PubMed Central journal article supplement (PMC9282584; doi:10.1371/journal.pone.0269875), 2022-07-14
Supplement: pone.0269875.s001.pdf [file pone.0269875.s001.pdf]

**A**

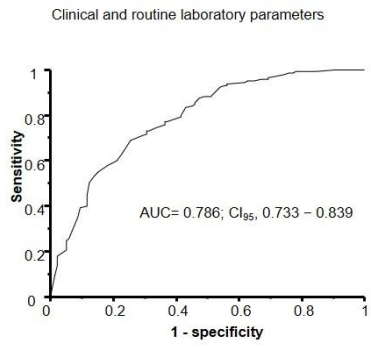

| Sensitivity (CI <sub>95</sub> ) | Specificity (CI <sub>95</sub> ) | PPV (CI <sub>95</sub> ) | NPV (CI <sub>95</sub> ) |
|---------------------------------|---------------------------------|-------------------------|-------------------------|
| 68.5%<br>(63.9-73.0)            | 74.5%<br>(70.2-78.7)            | 74.4%<br>(70.1-78.6)    | 68.9%<br>(64.3-73.4)    |

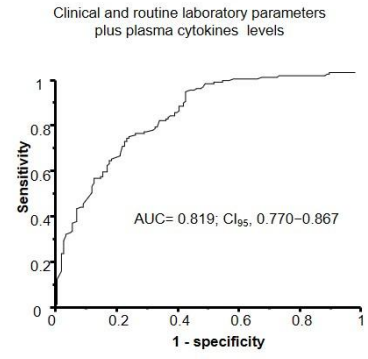

| Sensitivity (CI <sub>95</sub> ) | Specificity (CI <sub>95</sub> ) | PPV (CI <sub>95</sub> ) | NPV (CI <sub>95</sub> ) |
|---------------------------------|---------------------------------|-------------------------|-------------------------|
| 91.7%<br>(88.9-94.4)            | 56.6%<br>(51.7-61.4)            | 69.3%<br>(64.7-73.8)    | 86.5%<br>(83.1-89.8)    |

**B**

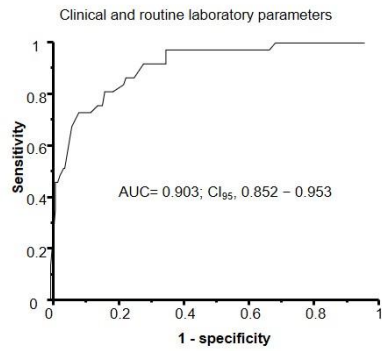

| Sensitivity (CI <sub>95</sub> ) | Specificity (CI <sub>95</sub> ) | PPV (CI <sub>95</sub> ) | NPV (CI <sub>95</sub> ) |
|---------------------------------|---------------------------------|-------------------------|-------------------------|
| 97.1%<br>(95.4-98.7)            | 68.8%<br>(64.3-73.3)            | 30.4% (25.8-34.9)       | 99.4%<br>(98.6-100,1)   |

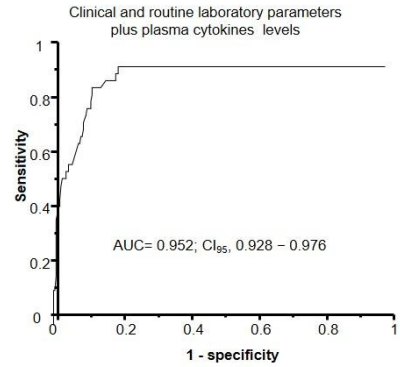

| Sensitivity (CI <sub>95</sub> ) | Specificity (CI <sub>95</sub> ) | PPV (CI <sub>95</sub> ) | NPV (CI <sub>95</sub> ) |
|---------------------------------|---------------------------------|-------------------------|-------------------------|
| 98.1%<br>(96.7-99.4)            | 82.7%<br>(78.9-86.4)            | 51.5%<br>(46.6-56.3)    | 99.6%<br>(98.9-100.2)   |
