# Supplementary material for: Clinical, laboratory data and inflammatory biomarkers at baseline as early discharge predictors in hospitalized SARS-CoV-2 infected patients
Source: PubMed Central journal article supplement (PMC9282584; doi:10.1371/journal.pone.0269875), 2022-07-14

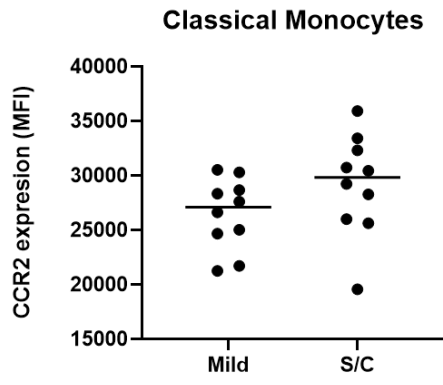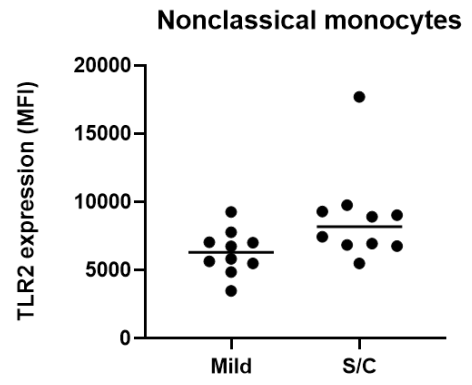

Supplement: pone.0269875.s002.pdf [file pone.0269875.s002.pdf]
