# Supplementary material for: Clinical, laboratory data and inflammatory biomarkers at baseline as early discharge predictors in hospitalized SARS-CoV-2 infected patients
Source: PubMed Central journal article supplement (PMC9282584; doi:10.1371/journal.pone.0269875), 2022-07-14
Supplement: pone.0269875.s003.pdf [file pone.0269875.s003.pdf]

|                                         | <b>Discharged</b> | <b>Non-discharged</b> |                      | <b>Non-Worsened</b> | <b>Worsened</b>   |                      |
|-----------------------------------------|-------------------|-----------------------|----------------------|---------------------|-------------------|----------------------|
|                                         | (n=157)           | (n=150)               | <b>P<sup>a</sup></b> | (n= 281)            | (n=37)            | <b>P<sup>b</sup></b> |
| Age (years)                             | 57 (42-70)        | 68 (55-78)            | 0.000                | 61 (47-74)          | 67 (55-78)        | 0.022                |
| Male sex.                               | 95 (60.5)         | 98 (65.3)             | 0.383                | 160 (59.3)          | 33 (89.2)         | 0.000                |
| Comorbidities                           | 104 (66.2)        | 117 (78.0)            | 0.022                | 191 (70.7)          | 30 (81.1)         | 0.190                |
| Diabetes mellitus                       | 30 (19.1)         | 35 (23.3)             | 0.523                | 53 (19.6)           | 12 (32.4)         | 0.079                |
| Hypertension                            | 53 (33.8)         | 80 (53.3)             | 0.002                | 111 (41.1)          | 22 (59.5)         | 0.036                |
| Heart disease                           | 18 (11.5)         | 35 (23.3)             | 0.011                | 46 (17)             | 7 (18.9)          | 0.790                |
| Chronic pulmonary disease               | 16 (10.2)         | 19 (12.7)             | 0.605                | 29 (10.7)           | 6 (16.2)          | 0.333                |
| Cancer                                  | 5 (3.2)           | 14 (9.3)              | 0.034                | 14 (5.2)            | 5 (13.5)          | 0.050                |
| Symptoms on admission                   |                   |                       |                      |                     |                   |                      |
| Cough                                   | 95 (60.5)         | 106 (70.7)            | 0.201                | 179 (66.3)          | 22 (59.5)         | 0.370                |
| Fever                                   | 94 (59.9)         | 90 (60.0)             | 0.722                | 160 (59.)           | 24 (64.9)         | 0.585                |
| Dyspnea                                 | 64 (40.8)         | 77 (51.3)             | 0.366                | 126 (46.7)          | 15 (40.5)         | 0.603                |
| Diarrhea                                | 40 (25.5)         | 36 (24.0)             | 0.572                | 70 (25.9)           | 6 (16.2)          | 0.191                |
| Arthromyalgia                           | 37 (23.6)         | 29 (19.3)             | 0.252                | 58 (21.5)           | 8 (21.6)          | 1.000                |
| SpO <sub>2</sub> (%)                    | 96 (94-97)        | 94 (91-96)            | 0.000                | 95 (93-97)          | 91 (89-95)        | 0.000                |
| Onset of symptoms until sampling (days) | 8 (6-11)          | 8 (5-12)              | 0.569                | 8 (5-12)            | 7 (5-9)           | 0.013                |
| CRP (mg/L)                              | 18 (5-54)         | 35 (8-101)            | 0.007                | 20 (5-64)           | 96 (29-173)       | 0.000                |
| LDH (UI/L)                              | 256 (218-309)     | 280 (232-375)         | 0.004                | 259 (221-315)       | 338 (274-448)     | 0.000                |
| D-dimer (ng/mL)                         | 543 (385-960)     | 787 (414-1263)        | 0.004                | 590 (390-1030)      | 836 (450-1638)    | 0.055                |
| Ferritin (ng/mL)                        | 390 (205-735)     | 526 (232-1222)        | 0.033                | 397 (198-837)       | 1339 (429-1623)   | 0.000                |
| Lymphocytes (x 10 <sup>9</sup> /L)      | 1.13 (0.84-1.60)  | 0.98 (0.72-1.40)      | 0.006                | 1.13 (0.79-1.52)    | 0.81 (0.54-0.90)  | 0.000                |
| Neutrophils (x 10 <sup>9</sup> /L)      | 5.50 (3.64-7.30)  | 6.60 (4.53-8.21)      | 0.000                | 5.8 (3.84-7.60)     | 7.42 (4.72-9.49)  | 0.010                |
| Monocytes (x 10 <sup>9</sup> /L)        | 0.45 (0.33-0.61)  | 0.45 (0.32-0.64)      | 0.795                | 0.46 (0.29-0.78)    | 0.36 (0.27-0.65)  | 0.106                |
| NLR                                     | 4.31 (2.8-6.7)    | 6.15 (3.9-9.9)        | 0.000                | 4.69 (2.99-7.87)    | 8.06 (5.92-14.51) | 0.000                |
| Hospitalized days                       | 5 (3-6)           | 11 (9-19)             | 0.000                | 7 (5-10)            | 17 (9-37)         | 0.000                |
| Treatment during first week             |                   |                       |                      |                     |                   |                      |
| Oral dexamethasone                      | 83 (52.9)         | 48 (32.0)             | 0.034                | 73 (27.0)           | 5 (13.5)          | 0.006                |
| Bolus of corticosteroids                | 41 (26.1)         | 31 (20.7)             | 0.261                | 65 (24.1)           | 7 (28.8)          | 0.488                |
| Remdesivir                              | 32 (20.4)         | 19 (12.7)             | 0.070                | 49 (18.1)           | 2 (5.4)           | 0.051                |
