# Supplementary material for: Clinical, laboratory data and inflammatory biomarkers at baseline as early discharge predictors in hospitalized SARS-CoV-2 infected patients
Source: PubMed Central journal article supplement (PMC9282584; doi:10.1371/journal.pone.0269875), 2022-07-14
Supplement: pone.0269875.s005.pdf [file pone.0269875.s005.pdf]

| <b>Variables</b>                   | <b>Cut-off point</b> | <b>AUC (95% CI)</b> | <b>SE</b> | <b>S</b> | <b>PPV</b> | <b>NPV</b> |
|------------------------------------|----------------------|---------------------|-----------|----------|------------|------------|
| SpO <sub>2</sub> (%)               | 93                   | 0.787 (0.715-0.859) | 71.2      | 77.2     | 36.6       | 93.5       |
| CRP (mg/L)                         | 67                   | 0.745 (0.674-0.816) | 65.4      | 76.5     | 34.0       | 92.3       |
| Ferritin (ng/mL)                   | 747                  | 0.725 (0.644-0.807) | 48.1      | 77.9     | 28.7       | 89.0       |
| D-dimer (ng/mL)                    | 727                  | 0.645 (0.566-0.725) | 67.3      | 61.9     | 24.6       | 91.1       |
| LDH (UI/L)                         | 328                  | 0.738 (0.658-0.818) | 61.5      | 79.0     | 35.2       | 92.9       |
| Neutrophiles (x10 <sup>9</sup> /L) | 7.18                 | 0.647 (0.561-0.734) | 57.7      | 66.9     | 24.4       | 89.5       |
| Lymphocytes (x10 <sup>9</sup> /L)  | 0.87                 | 0.711 (0.636-0.785) | 71.2      | 69.4     | 30.1       | 92.9       |
| Monocytes (x10 <sup>9</sup> /L)    | 0.31                 | 0.628 (0.537-0.718) | 50.0      | 79.7     | 31.3       | 89.6       |
| NLR                                | 5.86                 | 0.628 (0.537-0.718) | 50.0      | 79.7     | 31.3       | 89.6       |
| TNF- $\alpha$ (pg/mL)              | 12.8                 | 0.725 (0.655-0.795) | 78.8      | 63.0     | 28.3       | 94.1       |
| IL-6 (pg/mL)                       | 13.2                 | 0.650 (0.560-0.740) | 55.8      | 76.2     | 30.2       | 76.2       |
| IL-8 (pg/mL)                       | 9.9                  | 0.827 (0.770-0.884) | 76.9      | 77.2     | 38.5       | 94.8       |
| IL-1 $\beta$ (pg/mL)               | 0.85                 | 0.767 (0.714-0.820) | 96.2      | 54.4     | 28.1       | 98.7       |
| MIP-1 $\beta$ (pg/mL)              | 20.4                 | 0.650 (0.569-0.730) | 38.5      | 83.6     | 30.0       | 88.0       |
| sCD25 (pg/mL)                      | 2080                 | 0.787 (0.715-0.859) | 71.2      | 77.2     | 36.6       | 93.5       |
| IP-10 (pg/mL)                      | 1063                 | 0.745 (0.674-0.816) | 65.4      | 76.5     | 34.0       | 92.3       |
